# Supplementary material for: Association of a Common NOS1AP Variant with Attenuation of QTc Prolongation in Men with Heroin Dependence Undergoing Methadone Treatment
Source: MDPI journal article supplement (doi:10.3390/jpm12050835), 2022-05-20
Supplement: s1 [file s1]

**Association of a Common *NOS1AP* Variant with Attenuation of QTc  
Prolongation in Men with Heroin Dependence Undergoing Methadone  
Treatment**

Kuan-Cheng Chang<sup>a, b\*</sup> M.D., Ph.D., Ke-Wei Chen<sup>a\*</sup>, MD, Chieh-Liang Huang<sup>c\*</sup>  
M.D., Ph.D., Wen-Ling Liao<sup>d, e</sup> Ph.D., Mei-Yao Wu<sup>f, g</sup> M.D., Ph.D, Yu-Kai Lin<sup>a, b</sup>  
M.D., Yi-Tzone Shiao<sup>h</sup> M.S., Wei-Hsin Chung<sup>a, b</sup> M.D., Yen-Nien Lin<sup>a, b</sup> M.D., Ph.D.,  
and Hsien-Yuan Lane<sup>b, i</sup> M.D., Ph.D.

\*K.-C. Chang, K.-W. Chen, and C.-L. Huang contributed equally to the work.

<sup>a</sup>Division of Cardiovascular Medicine, Department of Medicine, China Medical University Hospital, Taichung 404332, TAIWAN

<sup>b</sup>Graduate Institute of Biomedical Sciences, China Medical University, Taichung 404333, TAIWAN

<sup>c</sup>Department of Addiction Treatment, Tsaotun Psychiatric Center, Ministry of Health and Welfare, Nan-Tou County 54249, TAIWAN

<sup>d</sup>Center for Personalized Medicine, China Medical University Hospital, Taichung 404332, TAIWAN

<sup>e</sup>Graduate Institute of Integrated Medicine, China Medical University, Taichung 404333, TAIWAN

<sup>f</sup>School of Post-Baccalaureate Chinese Medicine, China Medical University, Taichung, 40402, TAIWAN

<sup>g</sup>Department of Chinese Medicine, China Medical University Hospital, Taichung 404332, TAIWAN

<sup>h</sup>Center of Institutional Research and Development, Asia University, Taichung 413305 TAIWAN

<sup>i</sup>Department of Psychiatry, China Medical University Hospital, Taichung, 404332,  
TAIWAN

**Supplementary Table S1. Polymerase chain reaction (PCR) primers and probes in the genotyping single-nucleotide polymorphisms (SNPs) spanning the entire *NOS1AP* gene.**

| Gene           | PCR amplification primers                                                     | Taq probes                                                     |
|----------------|-------------------------------------------------------------------------------|----------------------------------------------------------------|
| rs1963645-T/C  | F: GTG AGT GGG GGC AGG AGA<br>R: AAA CTC CTC TTC AGA AAT TTG AGC              | CGA CTG TAG GTG CGT AAC TCT GGG ACG AGG ATG<br>CAG GAA GAT GGA |
| rs3751284-A/G  | F: TGC AGC ACA CGC AGC AGA<br>R: AAG CCG CAG TGC CTA CCT                      | AGA GCG AGT GAC GCA TAC TAC AGA TGG CCA GGA<br>AGA TGG AGA GAG |
| rs737641-C/T   | F: TAC ACA CTT TCC CTC ACA CAT G<br>R: TTA GCC TTC CTT GGT GCA                | GCG GTA GGT TCC CGA CAT ATA CAC AAA ACA CAC<br>ACA CAC ACA CCA |
| rs164151-T/C   | F: TTT ATA TAT ACA TGT GTG AGG GAA AGT G<br>R: AAA ACA CAA ATC TGT TGC TGA TT | GAC CTG GGT GTC GAT ACC TAA GGA TTG TAA CCA<br>GAC GGA AAA GAA |
| rs1415263-T/C  | F: TAA AAT GGA AAT CTG TCA ACT GC<br>R: GTG AGC CCC AAT GTC ACC               | AGC GAT CTG CGA GAC CGT ATG GTT GGA AGG CAA<br>CAT ACT TGA TGA |
| rs945713-C/T   | F: AGA GAC TGC AGA AAT GAT AAC TTC A<br>R: ACT TGT ATA TTC TGT GTG ACA CTC C  | GGA TGG CGT TCC GTC CTA TTT TTT TGA CAT ATT<br>GAA TTT AAG GTG |
| rs1572495-C/T  | F: TAA TGA AAC AGA GAT CAG GGA CA<br>R: CTG CCT AAA TAT CCT TTG CTT CT        | ACG CAC GTC CAC GGT GAT TTA GAG GAT GCA GAT<br>TTG AGC TGA GCC |
| rs10494366-G/T | F: AAT GAA TTC AAA GGT CAG TTT TAT C<br>R: ATG TGT CCT AGA TAG AGA CCA GTA CA | ACG CAC GTC CAC GGT GAT TTC AGT ACA AAT TCT<br>CAG AAT TTA AAA |
| rs6683968-T/G  | F: TTA AGA CCA TGG TGT CTG G<br>R: AAG TGA AGC TTA GAG AAG TTT AGT AAT<br>CTG | AGC GAT CTG CGA GAC CGT ATT TCA AAG CCT GTC<br>TCT ATA ACT CAC |
| rs1415257-G/A  | F: AAT TAT TCC ACA CAA ACA CCA AA                                             | GCG GTA GGT TCC CGA CAT ATA AGA AAA TCC ACT                    |

| Gene          | PCR amplification primers                                                   | Taq probes                                                     |
|---------------|-----------------------------------------------------------------------------|----------------------------------------------------------------|
|               | R: ACT TTT ATA GAG TAA ATT GAA GGG TAT<br>TCA                               | AGC TGA AAC ACT                                                |
| rs164148-G/A  | F: TAG GCT TTG CCT AGG GAT C<br>R: CAG CCA CTT ATG GCC TTA CA               | GGC TAT GAT TCG CAA TGC TTT ACT CCT TAA CGG<br>GCT GGC TGG GGC |
| rs164149-A/G  | F: ATT TTG GGA TAA TCA TAT CCT TGC<br>R: TTA ACA GAT TTT CAA ATG CCT GA     | AGG GTC TCT ACG CTG ACG ATA GGA TAA AGA CTT<br>AAT TCC CCG AAC |
| rs164146-G/C  | F: TTG GGT CAG GGA CCA CAG<br>R: AAT TGC ACA TGG CAC TTT TT                 | GTG ATT CTG TAC GTG TCG CCT TGC CAC CCT TGG<br>CCC ATC TCT CTG |
| rs2661818-G/C | F: TTA TTT ACT AAA AAC AGC CCA GG<br>R: TGC TAG TGC TCC TGC TCC             | GAC CTG GGT GTC GAT ACC TAG GTC TTC AAC CTC<br>CTT CCA CTA TGA |
| rs164147-C/A  | F: ACT GTG AGA CTG TTT TTG TCC AC<br>R: TAG ATC ATA AAA GAT AAG ACA ATT GCA | AGA TAG AGT CGA TGC CAG CTC TCT GGG TGC GTG<br>CCT TGA GCA CAC |
| rs1876986-A/G | F: TTT GCC TAG GGA TCA CTA CTC C<br>R: TTT GAA AAT CTG TTA ACA GCC AC       | AGA GCG AGT GAC GCA TAC TAG GGC TGG CTG GGG<br>CGA TGA GGA AAA |
| rs1964052-C/T | F: AGC CCT GCT TCC TCT GTG<br>R: TAT GTT TTC TGC TGG AAT ATA GGG            | CGA CTG TAG GTG CGT AAC TCC CAA GAA AGC ACC<br>ACC AAA AAC TTA |
